# Supplementary material
Source: MDPI journal article supplement (https://www.mdpi.com/2311-5637/6/1/28)
Supplement: s1 [file s1]

Supplementary Materials:

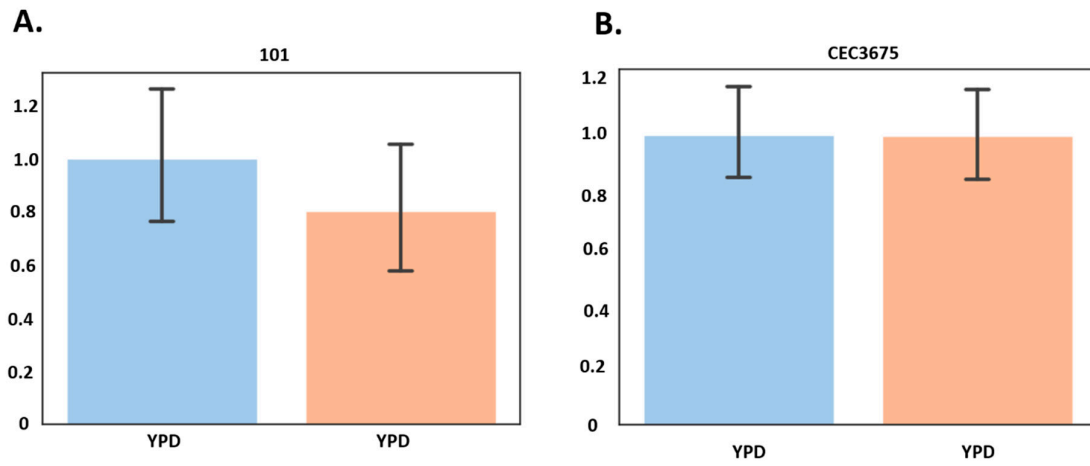

Figure S1: Nanomotion signal of strain 101 is not perturbed while recording for a long time.

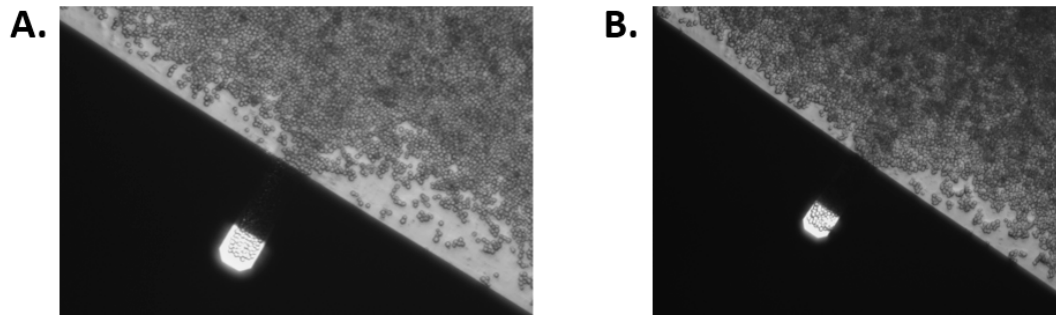

Figure S2: Density of yeast cells on cantilever at the start of the experiment (A) and at the end of the experiment (B). The size of the cantilever is 40 by 130  $\mu\text{m}$ .
